# Supplementary material for: Asymmetric Michael reactions catalyzed by a highly efficient and recyclable quaternary ammonium ionic liquid-supported organocatalyst in aqueous media
Source: Royal Society of Chemistry journal article supplement (doi:10.1039/c3ob27398a), 2013-01-01

**Asymmetric Michael Reactions Catalyzed by a Highly Efficient and Recyclable Quaternary  
Ammonium Ionic Liquid-Supported Organocatalyst in Aqueous Media**

Subrata Ghosh, Yupu Qiao, Bukuo Ni\* and Allan D. Headley\*

Department of Chemistry, Texas A&M University-Commerce

Commerce, TX 75429-3001, USA

E-Mail: [allan.headley@tamuc.edu](mailto:allan.headley@tamuc.edu); [bukuo.ni@tamuc.edu](mailto:bukuo.ni@tamuc.edu)

Supporting Information

|                                            |        |
|--------------------------------------------|--------|
| General Information.....                   | S2     |
| Synthesis of catalyst <b>1</b> .....       | S2-S3  |
| The data of Michael addition reaction..... | S4-S7  |
| References.....                            | S7     |
| HPLC spectra of <b>3</b> .....             | S8-S18 |

**General information:** Commercial reagents were used as received, unless otherwise stated. Merck 60 silica gel was used for chromatography, and Whatman silica gel plates with fluorescence UV254 were used for thin-layer chromatography (TLC) analysis.  $^1\text{H}$  and  $^{13}\text{C}$  NMR spectra were recorded on the Bruker Avance 400. The high resolution mass spectra were analyzed by using ESI-TOF high-acc from the Scripps Research Institute. All the compounds synthesized (shown in Table 3) in the manuscript are known compounds.<sup>1</sup> Their relative and absolute configurations of the products were determined by comparison with the known  $^1\text{H}$  and  $^{13}\text{C}$  NMR, chiral HPLC analysis, and optical rotation values.

### Synthesis of the catalyst1:

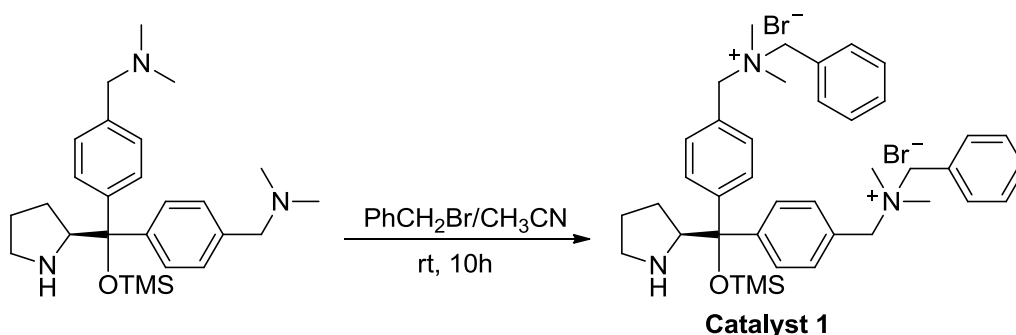

Benzyl bromide (521mg, 3 mmol) was added dropwise to the solution of diarylprolinol silyl ether (670 mg, 1.5 mmol) in  $\text{CH}_3\text{CN}$  (10 mL). After addition, the reaction mixture was continued to stirring overnight. The reaction mixture was concentrated and the crude product was washed with diethyl ether (5x10 mL) to give the product **1** as a solid (1.13g, 95% yield).  $[\alpha]_{\text{D}}^{25} = -4.8$  ( $c = 0.5$ , MeOH).  $^1\text{H}$  NMR (400 MHz, MeOH)  $\delta = 7.72$ - $6.97$  (m, 18H),  $4.56$ - $4.52$  (dd,  $J = 18\text{Hz}$ ,  $10\text{Hz}$ , 8H),  $3.88$ - $3.57$  (m, 2H),  $2.88$ - $2.76$  (m, 12H),  $2.42$ - $2.26$  (m, 3H),  $2.00$ - $1.92$  (m, 2H),  $1.74$ - $1.72$  (m, 1H),  $1.32$ - $1.17$  (m, 1H),  $0.66$  (s, 1H),  $-0.01$ - $-0.27$  (m, 9H).  $^{13}\text{C}$  NMR (100 MHz, MeOH)  $\delta = 135.5$ ,  $135.4$ ,  $135.3$ ,  $135.2$ ,  $135.2$ ,  $134.3$ ,  $134.2$ ,  $132.8$ ,  $132.6$ ,  $132.3$ ,  $131.3$ ,  $131.2$ ,  $130.1$ ,  $130.0$ ,  $129.6$ ,  $128.9$ ,  $86.9$ ,  $84.8$ ,  $84.4$ ,  $70.3$ ,  $69.8$ ,  $64.2$ ,  $56.8$ ,  $48.3$ ,  $31.1$ ,  $29.0$ ,  $26.5$ ,  $25.8$ ,  $3.2$ ,  $3.2$ ,

1.8. HRMS (ESI-TOF high-acc)  $m/z$  calcd for  $C_{40}H_{55}N_3OSi_2^+$  (M-2Br<sup>-</sup>): 621.4103, found: 621.4102.

### **The general procedure for the Michael addition reactions of aldehydes to nitroolefines**

In a 5 mL flask was added the catalyst **1** (0.02 mmol), acid (0.12mmol), nitroolefin (0.4 mmol) water (0.5 mL) and aldehyde (0.8 mmol). The reaction mixture was stirred for the listed hours and extracted with Et<sub>2</sub>O:Hexane = 1:8 (v/v). The crude product was purified by flash column chromatography (eluent: hexane/ethyl acetate) to give the Michael Addition products shown in Table 2.

### **Experimental procedure for catalyst **1** recycling on water**

*n*-Pentanal (0.0689g, 0.8 mmol) was added to a solution of catalyst **1** (15.6 mg, 0.02 mmol), *trans*- $\beta$ -nitroolefins (59.7mg, 0.4 mmol) and IL-Benzoic acid (48.5 mg, 0.12mmol) on water (0.5 mL) at room temperature for 18 h. The reaction mixture was extracted with a solvent mixture of ethyl ether-hexane (1:8, 2 x 3 mL). The organic phase was combined and concentrated in vacuum to give the crude product, which was purified by flash column chromatography (silica gel, hexane/AcOEt = 5/1) to afford the Michael adduct **2a** (99%) with enantioselectivity (99% *ee*) and diastereoselectivity (*syn/anti* = 96/4). The recovered aqueous phase was used directly for the next cycle by addition of new reactants *n*-Pentanal (0.0689g, 0.8 mmol) and *trans*- $\beta$ -nitroolefins (59.7mg, 0.4 mmol). The reaction mixture was stirred for the listed time in Table 3.

**(R)-2-((S)-2-nitro-1-phenylethyl) pentanal**

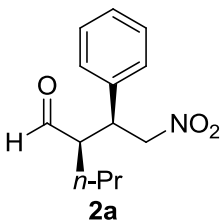

Yield: 93.2mg, 99%.  $^1\text{H}$  NMR (400 MHz,  $\text{CDCl}_3$ )  $\delta$  = 9.70 (d,  $J$  = 2.8 Hz, 1H), 7.38-7.15 (m, 5H), 4.73-4.62 (m, 2H), 3.78 (dt,  $J$  = 7.2 and 5.2 Hz, 1H), 2.74-2.67 (m, 1H), 1.54-1.12 (m, 4H), 0.80 (t,  $J$  = 7.2 Hz, 3H);  $^{13}\text{C}$  NMR (100 MHz,  $\text{CDCl}_3$ )  $\delta$  = 203.3, 136.7, 128.8, 127.8, 127.83, 78.3, 53.5, 42.9, 29.1, 19.5, 13.7. HPLC: Chiralcel OD-H column, 80:20 hexane:isopropanol,

flow rate 1.0 mL/min, syn/anti= 96:4, 99% ee, Syn:  $t_{\text{R}}$ = 11.0 min (minor),  $t_{\text{R}}$ =14.6 min (major).

**(2R,3S)-2-isopropyl-4-nitro-3-phenylbutanal**

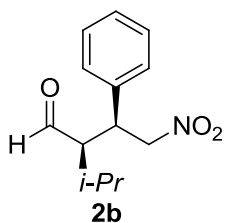

Yield: 68.7mg, 73%.  $^1\text{H}$  NMR (400 MHz,  $\text{CDCl}_3$ )  $\delta$  = 9.93 (d,  $J$  = 2.0 Hz, 1H), 7.37-7.17 (m, 5H), 4.69-4.55 (m, 2H), 3.90 (dt,  $J$  = 10.4 and 4.4 Hz, 1H), 2.80-2.74 (m, 1H), 1.76-1.68 (m, 1H), 1.10 (d,  $J$  = 7.2 Hz, 3H), 0.89(d,  $J$  = 7.2 Hz, 3H);  $^{13}\text{C}$  NMR (100 MHz,  $\text{CDCl}_3$ )  $\delta$  = 204.3, 137.1, 129.1, 128.4, 128.1, 127.9, 79.0, 58.8, 41.9, 27.9, 21.6, 17.0. HPLC: Chiralcel IC column,

80:20 hexane:isopropanol, flow rate 0.8 mL/min, syn/anti= 98:2, 99% ee, Syn:  $t_{\text{R}}$ = 17.3 min (minor),  $t_{\text{R}}$ =18.2 min (major).

**(R)-2-((S)-2-nitro-1-phenylethyl)hexanal**

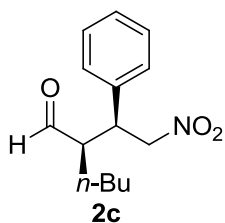

Yield: 98.7mg, 99%.  $^1\text{H}$  NMR (400 MHz,  $\text{CDCl}_3$ )  $\delta$  9.70 (d,  $J$  = 2.8 Hz, 1H), 7.37-7.15 (m, 5H), 4.73-4.61 (m, 2H), 3.77 (dt,  $J$  = 10.0 and 4.2 Hz, 1H), 2.73-2.66 (m, 1H), 1.68-1.06 (m, 6H), 0.78 (t,  $J$  = 6.8 Hz, 3H);  $^{13}\text{C}$  NMR (100 MHz,  $\text{CDCl}_3$ )  $\delta$  = 203.3, 136.8, 129.1, 128.1, 128.0, 78.4, 53.8, 43.1,

28.5, 27.0, 22.4, 13.6. HPLC: Chiralcel OD-H column, 80:20 hexane:isopropanol, flow rate 1.0 mL/min, syn/anti= 98:2, 99% ee, Syn:  $t_{\text{R}}$ = 10.2 min (minor),  $t_{\text{R}}$ =12.8 min (major).

**(R)-2-((S)-2-nitro-1-phenylethyl)heptanal**

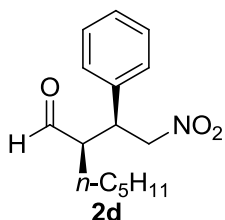

Yield: 103.2mg, 98%.  $^1\text{H}$  NMR (400 MHz,  $\text{CDCl}_3$ )  $\delta$  9.69 (d,  $J$  = 2.4 Hz, 1H), 7.36-7.15 (m, 5H), 4.73-4.60 (m, 2H), 3.78 (dt,  $J$  = 9.2 and 5.6 Hz, 1H), 2.74-

2.66 (m, 1H), 1.52-1.04 (m, 8H), 0.80 (t,  $J = 6.8$  Hz, 3H);  $^{13}\text{C}$  NMR (100 MHz,  $\text{CDCl}_3$ )  $\delta = 203.2, 136.8, 128.9, 128.0, 127.9, 78.4, 53.8, 43.0, 31.4, 27.2, 25.9, 22.1, 13.7$ . HPLC: Chiralcel OD-H column, 85:15 hexane:isopropanol, flow rate 1.0 mL/min, syn/anti= 98:2, 99% ee, Syn:  $t_{\text{R}} = 11.4$  min (minor),  $t_{\text{R}} = 14.9$  min (major).

**(R)-2-((S)-2-nitro-1-phenylethyl)nonanal**

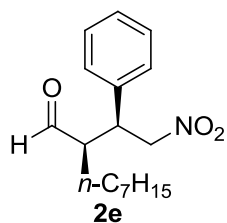

Yield: 109.6mg, 94%.  $^1\text{H}$  NMR (400 MHz,  $\text{CDCl}_3$ )  $\delta$  9.71 (d,  $J = 2.8$  Hz, 1H), 7.37-7.14 (m, 5H), 4.74-4.55 (m, 2H), 3.78 (dt,  $J = 9.6$  and  $5.2$  Hz, 1H), 2.74-2.66 (m, 1H), 1.64-1.04 (m, 12H), 0.84 (t,  $J = 7.2$  Hz, 3H);  $^{13}\text{C}$  NMR (100 MHz,  $\text{CDCl}_3$ )  $\delta = 203.2, 136.7, 129.0, 128.0, 127.9, 78.4, 53.8, 43.0, 31.5,$

29.2, 28.7, 27.2, 26.2, 22.4, 14.0. HPLC: Chiralcel OD-H column, 90:10 hexane:isopropanol, flow rate 1.0 mL/min, syn/anti= 98:2, 99% ee, Syn:  $t_{\text{R}} = 12.9$  min (minor),  $t_{\text{R}} = 17.7$  min (major).

**(R)-2-((S)-1-(4-methoxyphenyl)-2-nitroethyl)pentanal**

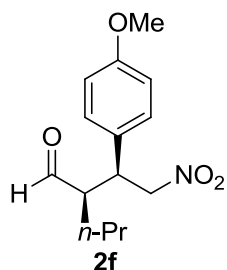

Yield: 92.3mg, 87%.  $^1\text{H}$  NMR (400 MHz,  $\text{CDCl}_3$ )  $\delta$  9.70 (d,  $J = 2.8$  Hz, 1H), 7.08 (d,  $J = 8.8$  Hz, 2H), 6.87 (d,  $J = 8.8$  Hz, 2H), 4.69-4.56 (m, 2H), 3.79 (s, 3H), 3.75-2.62 (m, 1H), 2.68-2.62 (m, 1H), 1.53-1.14 (m, 4H), 0.81 (t,  $J = 7.2$  Hz, 3H);  $^{13}\text{C}$  NMR (100 MHz,  $\text{CDCl}_3$ )  $\delta = 203.4, 159.1, 129.2, 129.0, 128.5,$

114.4, 78.6, 55.1, 53.9, 42.4, 29.3, 19.7, 13.9. HPLC: Chiralcel IC column, 80:20 hexane:isopropanol, flow rate 0.8 mL/min, syn/anti= 94:6, 99% ee, Syn:  $t_{\text{R}} = 24.2$  min (minor),  $t_{\text{R}} = 27.6$  min (major).

**(R)-2-((S)-1-(3-methoxyphenyl)-2-nitroethyl)pentanal**

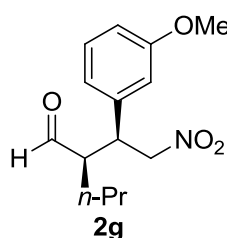

Yield: 101.9mg, 96%.  $^1\text{H}$  NMR (400 MHz,  $\text{CDCl}_3$ )  $\delta = 9.69$  (d,  $J = 2.8$  Hz, 1H), 7.28-7.23 (m, 1H), 6.84-6.71 (m, 3H), 4.71-4.60 (m, 2H), 3.79 (s, 3H), 3.80-3.70 (m, 1H), 2.72-2.65 (m, 1H), 1.56-1.10 (m, 4H), 0.81 (t,  $J = 7.2$  Hz, 3H);

$^{13}\text{C}$  NMR (100 MHz,  $\text{CDCl}_3$ )  $\delta$  = 203.0, 159.9, 138.4, 130.1, 120.1, 114.2, 112.9, 78.2, 55.2, 53.7, 43.1, 29.4, 19.7, 13.9. HPLC: Chiralcel OD-H column, 90:10 hexane:isopropanol, flow rate 1.0 mL/min, syn/anti= 95:5, 99% ee, Syn:  $t_{\text{R}}$  = 21.4 min (minor),  $t_{\text{R}}$  = 48.0 min (major).

**(R)-2-((R)-1-(furan-2-yl)-2-nitroethyl)pentanal**

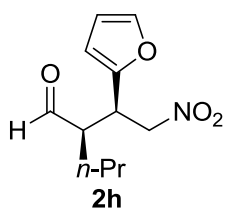

Yield: 89.2mg, 99%.  $^1\text{H}$  NMR (400 MHz,  $\text{CDCl}_3$ )  $\delta$  = 9.69 (d,  $J$  = 2.0 Hz, 1H), 7.36 (d,  $J$  = 2.4 Hz, 1H), 6.30 (d,  $J$  = 3.6 and 2.4 Hz, 1H), 6.19 (d,  $J$  = 3.2 Hz, 1H), 4.75-4.63 (m, 2H), 4.01 (dt,  $J$  = 8.8 and 5.2, 1H), 2.82-2.76 (m, 1H), 1.58-1.16 (m, 4H), 0.87 (t,  $J$  = 7.2 Hz, 3H);  $^{13}\text{C}$  NMR (100 MHz,

$\text{CDCl}_3$ )  $\delta$  = 202.3, 150.1, 142.5, 110.3, 108.6, 76.0, 52.0, 36.9, 28.9, 19.8, 13.9. HPLC: Chiralcel OD-H column, 90:10 hexane:isopropanol, flow rate 0.8 mL/min, syn/anti= 99:1, 99% ee, Syn:  $t_{\text{R}}$  = 14.1 min (major),  $t_{\text{R}}$  = 30.3 min (minor).

**(R)-2-((S)-1-(4-bromophenyl)-2-nitroethyl)pentanal**

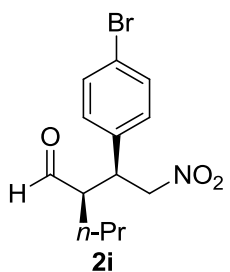

Yield: 118.1mg, 94%.  $^1\text{H}$  NMR (400 MHz,  $\text{CDCl}_3$ )  $\delta$  = 9.68 (d,  $J$  = 2.4 Hz, 1H), 7.48 (d,  $J$  = 8.0 Hz, 2H), 7.07 (d,  $J$  = 8.0 Hz, 2H), 4.73-4.58 (m, 2H), 3.76 (dt,  $J$  = 9.6 and 4.8 Hz, 1H), 2.72-2.65 (m, 1H), 1.52-1.12 (m, 4H), 0.81 (t,  $J$  = 7.2 Hz, 3H);  $^{13}\text{C}$  NMR (100 MHz,  $\text{CDCl}_3$ )  $\delta$  = 202.8, 135.9, 132.2,

129.6, 122.0, 78.0, 53.4, 42.4, 29.4, 19.6, 13.8. HPLC: Chiralcel IC column, 80:20 hexane:isopropanol, flow rate 0.8 mL/min, syn/anti= 92:8, 99% ee, Syn:  $t_{\text{R}}$  = 19.1 min (minor),  $t_{\text{R}}$  = 19.6 min (major).

**(2R, 3R)-2-benzyl-3-(nitromethyl)heptanal**

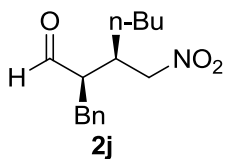

Yield: 79.0mg, 75%.  $^1\text{H}$  NMR (400 MHz,  $\text{CDCl}_3$ )  $\delta$  = 9.69 (d,  $J$  = 0.8 Hz, 1H), 7.34-7.16 (m, 5H), 4.50-4.34 (m, 2H), 3.11-2.66 (m, 4H), 1.58-1.20 (m,

6H), 0.88 (t,  $J = 6.8$  Hz, 3H);  $^{13}\text{C}$  NMR (100MHz,  $\text{CDCl}_3$ )  $\delta = 202.4, 138.2, 128.9, 128.8, 126.8, 76.9, 54.1, 37.0, 31.5, 29.0, 28.9, 22.4, 13.8$ . HPLC: Chiralcel IC column, 90:10 hexane:isopropanol, flow rate 1.0 mL/min, syn/anti= 96:4, 99% ee, Syn:  $t_{\text{R}} = 11.5$  min (minor),  $t_{\text{R}} = 16.2$  min (major).

### References:

1. (a) A. Alexakis, O. Andrey, *Org. Lett.*, 2002, **4**, 3611. (b) J. M. Betancort, C. F. Barbas III, *Org. Lett.*, 2001, **3**, 3737. (c) W. Wang, J. Wang, H. Li, *Angew. Chem. Int. Ed.*, 2005, **44**, 1369. (d) L. Zu, J. Wang, H. Li, W. Wang, *Org. Lett.*, 2006, **8**, 3077. (e) B. Ni, Q. Zhang, A. D. Headley, *Green Chem.*, 2007, **9**, 737. (f) Q. Zhang, B. Ni, A. D. Headley, *tetrahedron*, 2008, **64**, 5091. (g) J. Wu, B. Ni, A. D. Headley, *Org. Lett.*, 2009, **11**, 3354-3356. (h) S. Zhu, S. Yu, D. Ma, *Angew. Chem. Int. Ed.*, 2008, **47**, 545. (i) Z. Zheng, B. Perkins, B. Ni, *J. Am. Chem. Soc.*, 2010, **132**, 50.

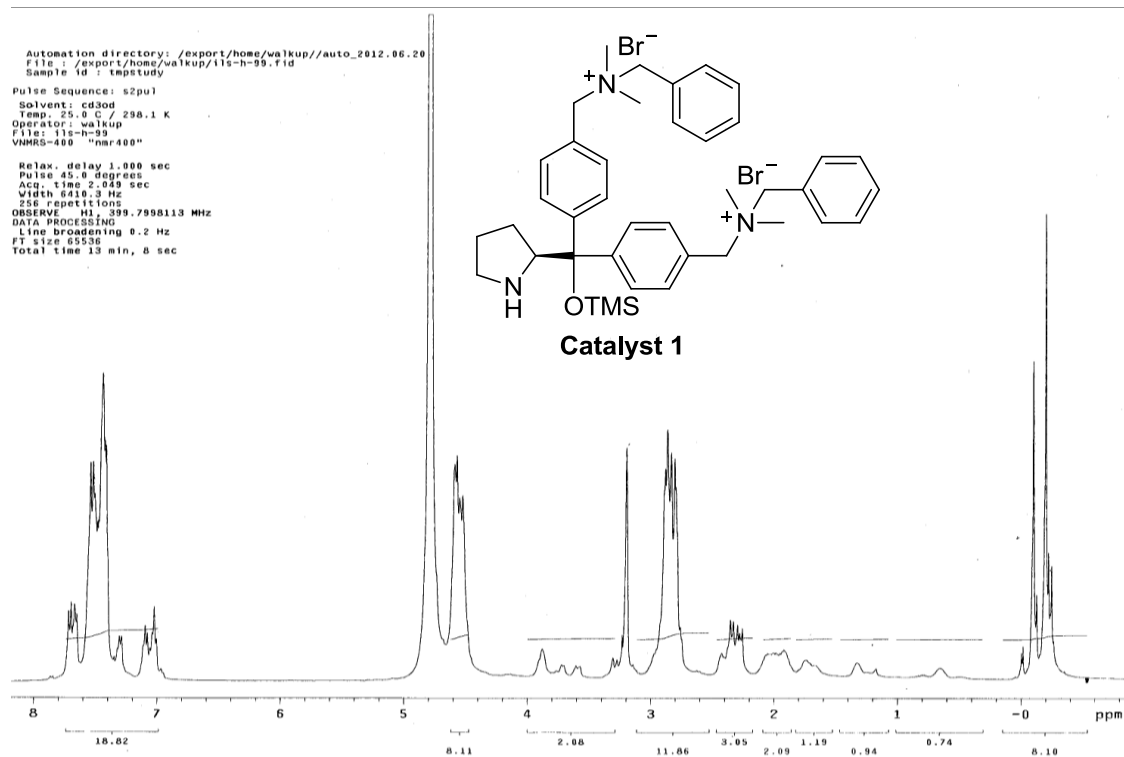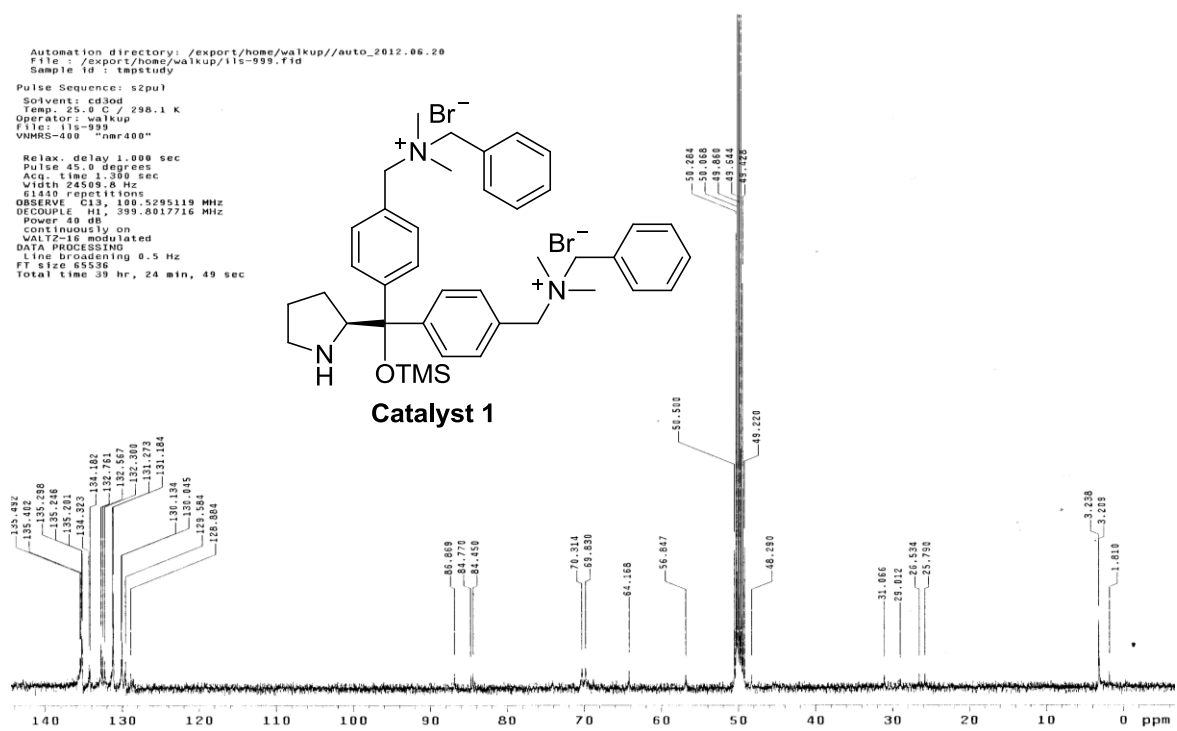



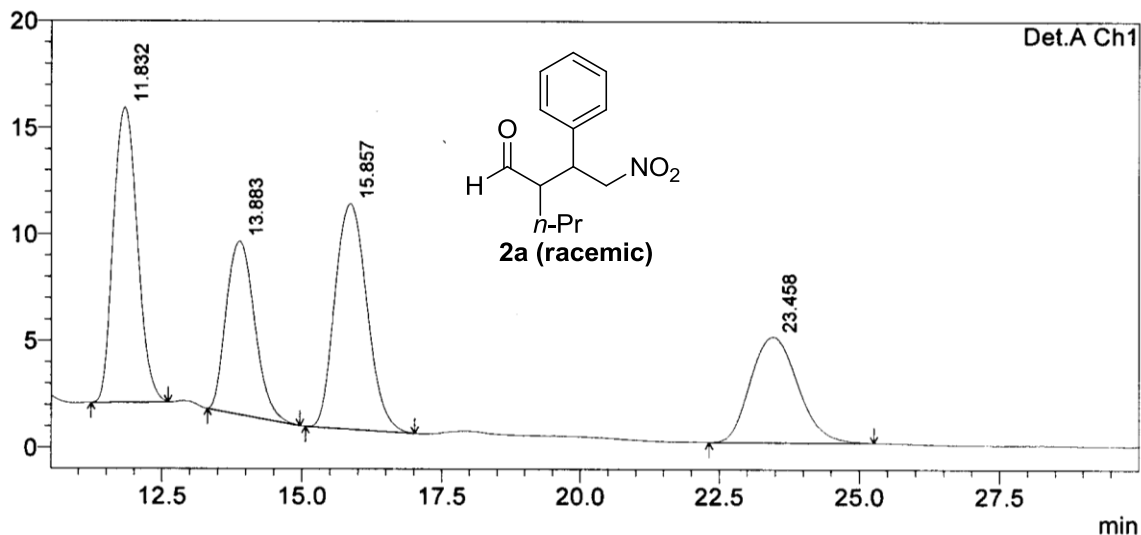

Detector A Ch1 254nm

| Peak# | Ret. Time | Area    | Height | Area %  | Height % |
|-------|-----------|---------|--------|---------|----------|
| 1     | 11.832    | 415953  | 13827  | 29.343  | 36.922   |
| 2     | 13.883    | 287066  | 8112   | 20.251  | 21.662   |
| 3     | 15.857    | 422564  | 10570  | 29.809  | 28.223   |
| 4     | 23.458    | 291982  | 4941   | 20.597  | 13.193   |
| Total |           | 1417565 | 37450  | 100.000 | 100.000  |

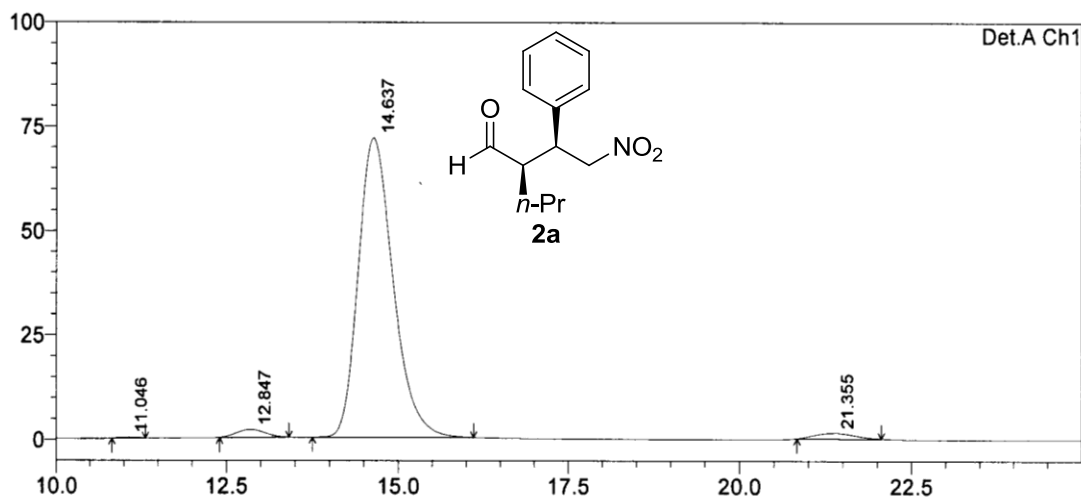

Detector A Ch1 254nm

| Peak# | Ret. Time | Area    | Height | Area %  | Height % |
|-------|-----------|---------|--------|---------|----------|
| 1     | 11.046    | 3448    | 196    | 0.130   | 0.261    |
| 2     | 12.847    | 53396   | 1863   | 2.012   | 2.480    |
| 3     | 14.637    | 2543949 | 71698  | 95.846  | 95.415   |
| 4     | 21.355    | 53406   | 1386   | 2.012   | 1.845    |
| Total |           | 2654199 | 75143  | 100.000 | 100.000  |

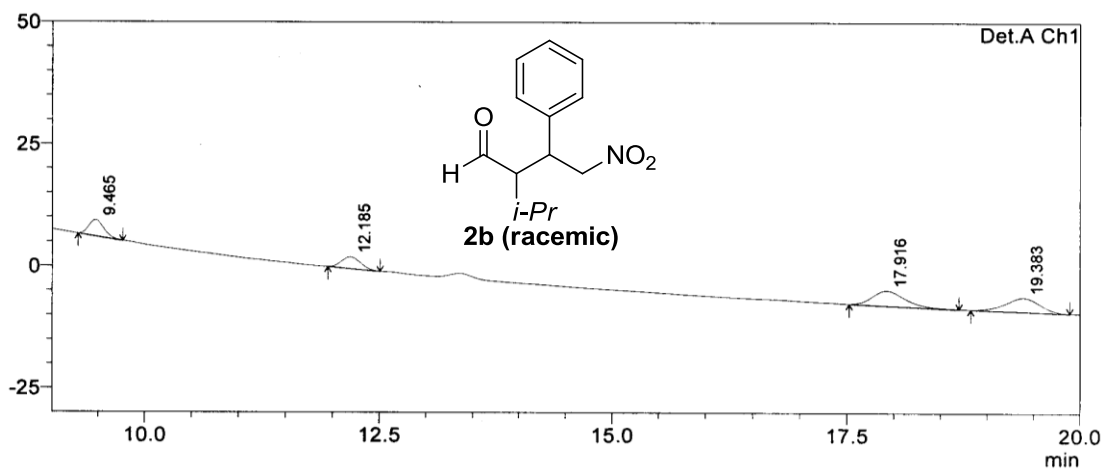

Detector A Ch1 254nm

| Peak# | Ret. Time | Area   | Height | Area %  | Height % |
|-------|-----------|--------|--------|---------|----------|
| 1     | 9.465     | 37139  | 3289   | 17.120  | 28.345   |
| 2     | 12.185    | 33406  | 2383   | 15.399  | 20.533   |
| 3     | 17.916    | 73195  | 3074   | 33.740  | 26.488   |
| 4     | 19.383    | 73199  | 2859   | 33.742  | 24.634   |
| Total |           | 216939 | 11605  | 100.000 | 100.000  |

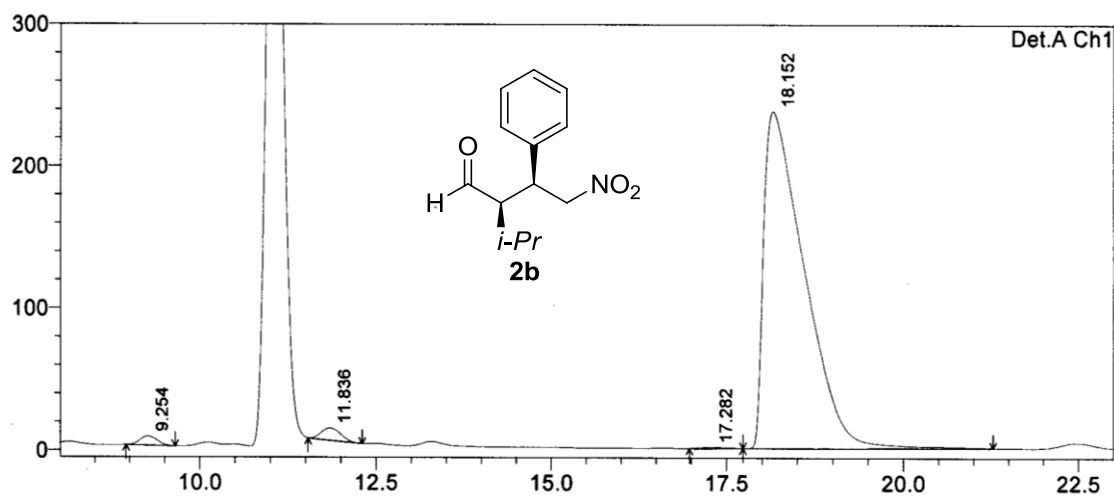

Detector A Ch1 254nm

| Peak# | Ret. Time | Area    | Height | Area %  | Height % |
|-------|-----------|---------|--------|---------|----------|
| 1     | 9.254     | 108400  | 6374   | 1.110   | 2.519    |
| 2     | 11.836    | 160657  | 8543   | 1.645   | 3.376    |
| 3     | 17.282    | 19361   | 873    | 0.198   | 0.345    |
| 4     | 18.152    | 9478535 | 237251 | 97.047  | 93.760   |
| Total |           | 9766953 | 253042 | 100.000 | 100.000  |

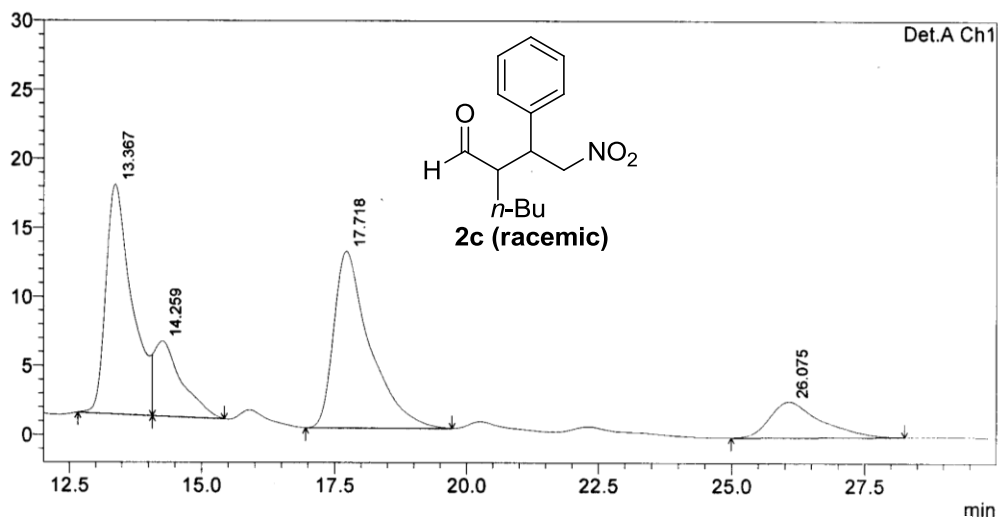

PeakTable

Detector A Ch1 254nm

| Peak# | Ret. Time | Area    | Height | Area %  | Height % |
|-------|-----------|---------|--------|---------|----------|
| 1     | 13.367    | 573094  | 16647  | 37.013  | 44.406   |
| 2     | 14.259    | 193508  | 5427   | 12.498  | 14.476   |
| 3     | 17.718    | 608990  | 12819  | 39.331  | 34.195   |
| 4     | 26.075    | 172781  | 2595   | 11.159  | 6.923    |
| Total |           | 1548373 | 37489  | 100.000 | 100.000  |

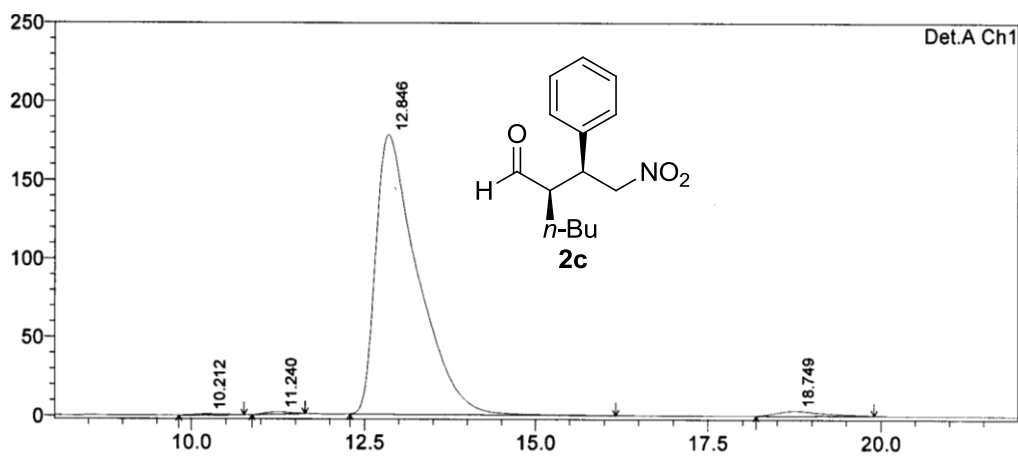

Detector A Ch1 254nm

| Peak# | Ret. Time | Area    | Height | Area %  | Height % |
|-------|-----------|---------|--------|---------|----------|
| 1     | 10.212    | 16706   | 675    | 0.215   | 0.369    |
| 2     | 11.240    | 35306   | 1493   | 0.454   | 0.817    |
| 3     | 12.846    | 7583479 | 177511 | 97.478  | 97.131   |
| 4     | 18.749    | 144166  | 3074   | 1.853   | 1.682    |
| Total |           | 7779657 | 182754 | 100.000 | 100.000  |

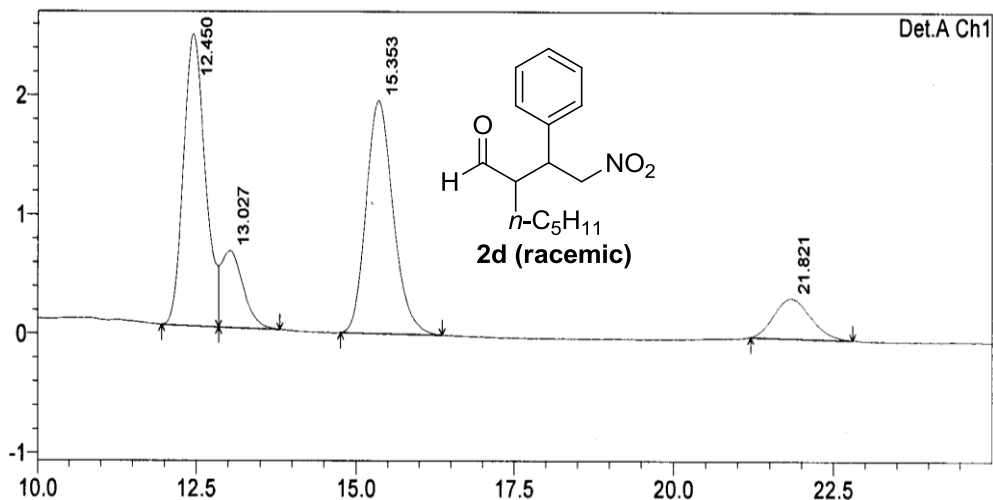

Detector A Ch1 254nm

| Peak# | Ret. Time | Area   | Height | Area %  | Height % |
|-------|-----------|--------|--------|---------|----------|
| 1     | 12.450    | 57988  | 2451   | 39.950  | 45.467   |
| 2     | 13.027    | 15523  | 645    | 10.694  | 11.967   |
| 3     | 15.353    | 58178  | 1958   | 40.081  | 36.318   |
| 4     | 21.821    | 13461  | 337    | 9.274   | 6.247    |
| Total |           | 145150 | 5391   | 100.000 | 100.000  |

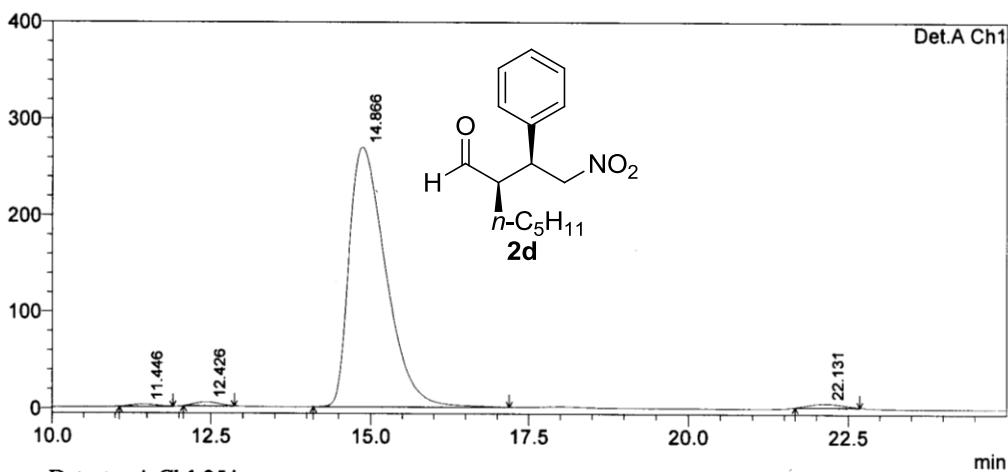

Detector A Ch1 254nm

| Peak# | Ret. Time | Area     | Height | Area %  | Height % |
|-------|-----------|----------|--------|---------|----------|
| 1     | 11.446    | 59772    | 2266   | 0.537   | 0.812    |
| 2     | 12.426    | 105783   | 4067   | 0.951   | 1.457    |
| 3     | 14.866    | 10814643 | 268834 | 97.244  | 96.288   |
| 4     | 22.131    | 140951   | 4032   | 1.267   | 1.444    |
| Total |           | 11121149 | 279198 | 100.000 | 100.000  |

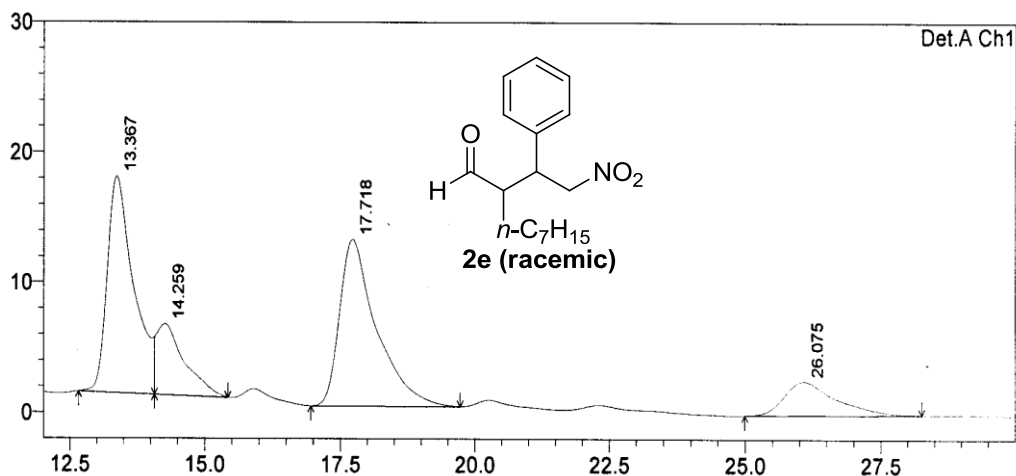

Detector A Ch1 254nm

| Peak# | Ret. Time | Area    | Height | Area %  | Height % |
|-------|-----------|---------|--------|---------|----------|
| 1     | 13.367    | 573094  | 16647  | 37.013  | 44.406   |
| 2     | 14.259    | 193508  | 5427   | 12.498  | 14.476   |
| 3     | 17.718    | 608990  | 12819  | 39.331  | 34.195   |
| 4     | 26.075    | 172781  | 2595   | 11.159  | 6.923    |
| Total |           | 1548373 | 37489  | 100.000 | 100.000  |

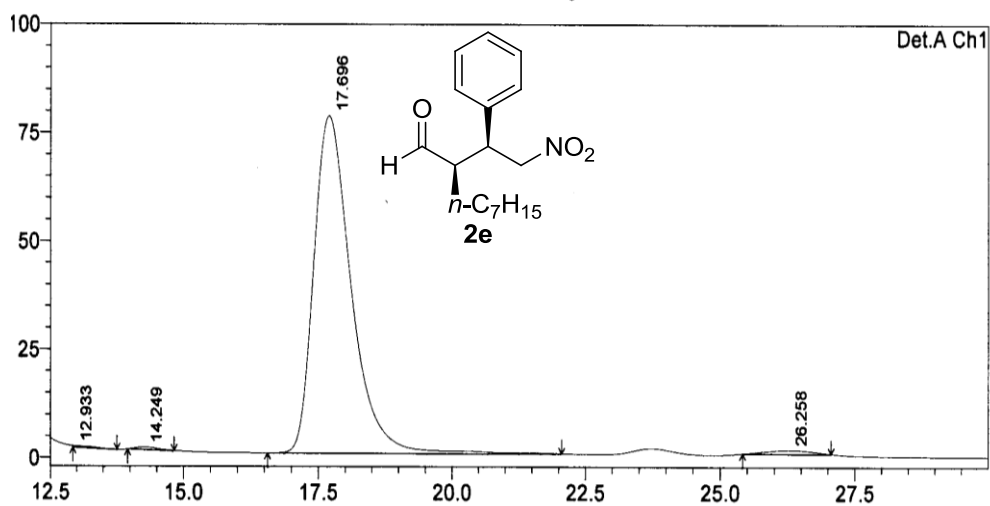

Detector A Ch1 254nm

| Peak# | Ret. Time | Area    | Height | Area %  | Height % |
|-------|-----------|---------|--------|---------|----------|
| 1     | 12.933    | 7658    | 275    | 0.199   | 0.346    |
| 2     | 14.249    | 15725   | 584    | 0.409   | 0.735    |
| 3     | 17.696    | 3772050 | 77836  | 98.080  | 97.834   |
| 4     | 26.258    | 50455   | 864    | 1.312   | 1.086    |
| Total |           | 3845889 | 79560  | 100.000 | 100.000  |

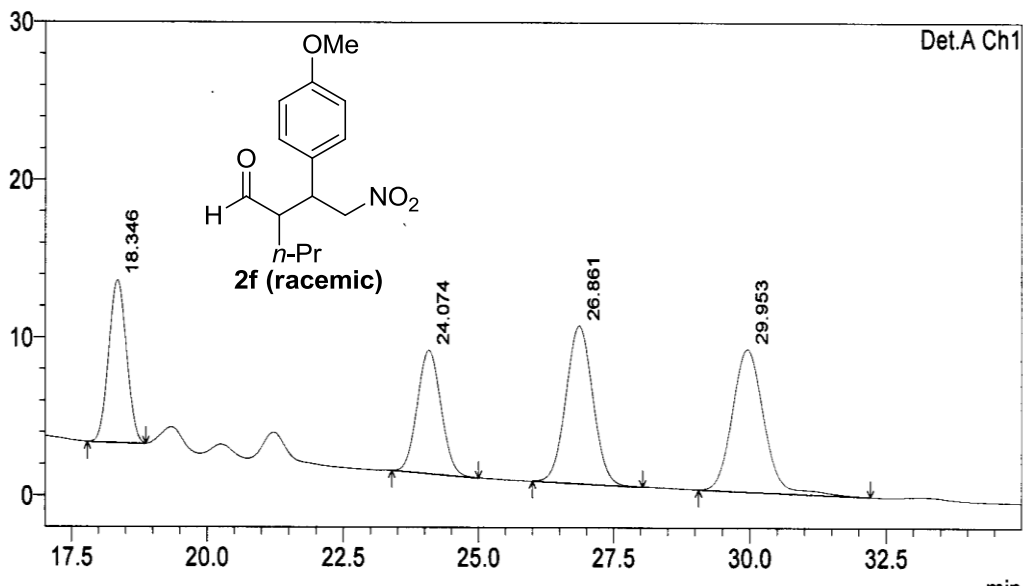

Detector A Ch1 254nm

| Peak# | Ret. Time | Area    | Height | Area %  | Height % |
|-------|-----------|---------|--------|---------|----------|
| 1     | 18.346    | 237332  | 10321  | 20.006  | 27.791   |
| 2     | 24.074    | 238039  | 7805   | 20.066  | 21.017   |
| 3     | 26.861    | 346063  | 9981   | 29.172  | 26.875   |
| 4     | 29.953    | 364852  | 9031   | 30.756  | 24.318   |
| Total |           | 1186286 | 37138  | 100.000 | 100.000  |

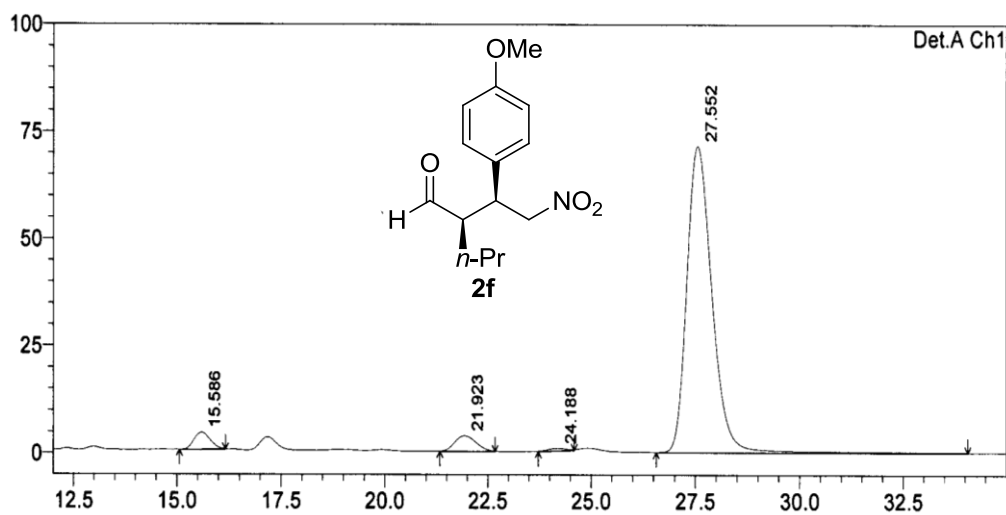

Detector A Ch1 254nm

| Peak# | Ret. Time | Area    | Height | Area %  | Height % |
|-------|-----------|---------|--------|---------|----------|
| 1     | 15.586    | 106474  | 3963   | 3.272   | 4.983    |
| 2     | 21.923    | 127994  | 3598   | 3.934   | 4.523    |
| 3     | 24.188    | 17763   | 585    | 0.546   | 0.735    |
| 4     | 27.552    | 3001509 | 71400  | 92.248  | 89.759   |
| Total |           | 3253740 | 79546  | 100.000 | 100.000  |

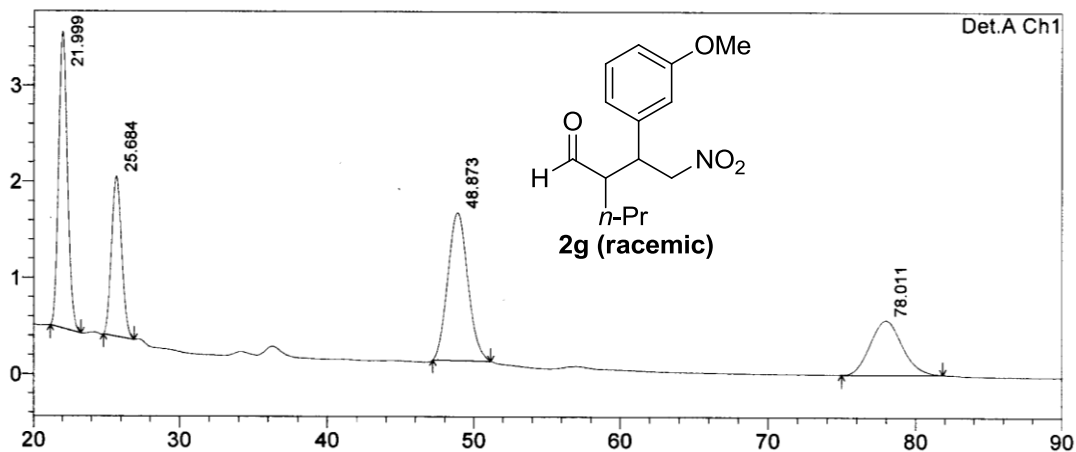

Detector A Ch1 254nm

| Peak# | Ret. Time | Area   | Height | Area %  | Height % |
|-------|-----------|--------|--------|---------|----------|
| 1     | 21.999    | 131718 | 3086   | 29.685  | 45.075   |
| 2     | 25.684    | 80163  | 1662   | 18.066  | 24.270   |
| 3     | 48.873    | 146378 | 1535   | 32.989  | 22.422   |
| 4     | 78.011    | 85458  | 564    | 19.260  | 8.232    |
| Total |           | 443717 | 6847   | 100.000 | 100.000  |

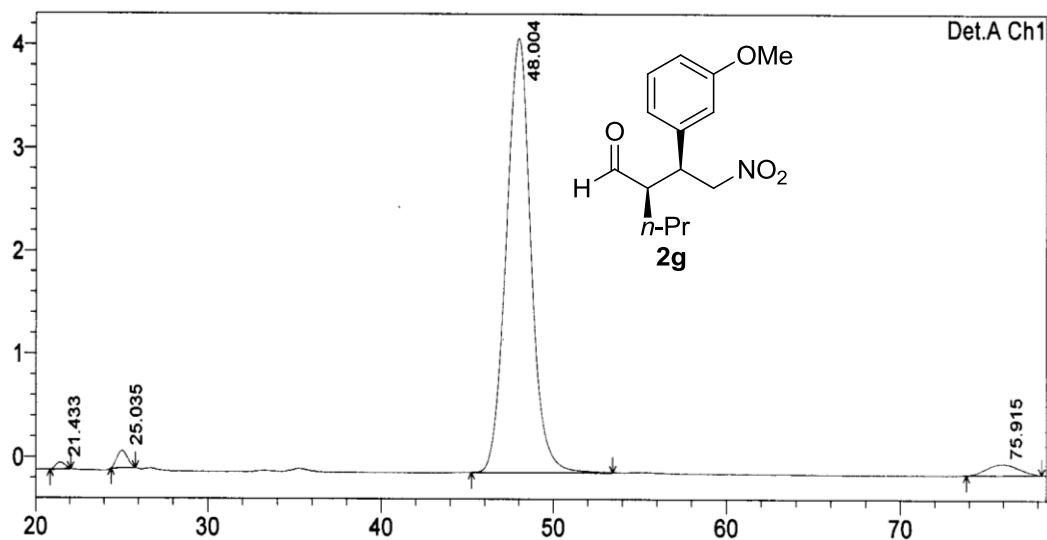

Detector A Ch1 254nm

| Peak# | Ret. Time | Area   | Height | Area %  | Height % |
|-------|-----------|--------|--------|---------|----------|
| 1     | 21.433    | 2318   | 65     | 0.525   | 1.424    |
| 2     | 25.035    | 7075   | 168    | 1.601   | 3.696    |
| 3     | 48.004    | 418829 | 4207   | 94.794  | 92.503   |
| 4     | 75.915    | 13609  | 108    | 3.080   | 2.377    |
| Total |           | 441832 | 4548   | 100.000 | 100.000  |

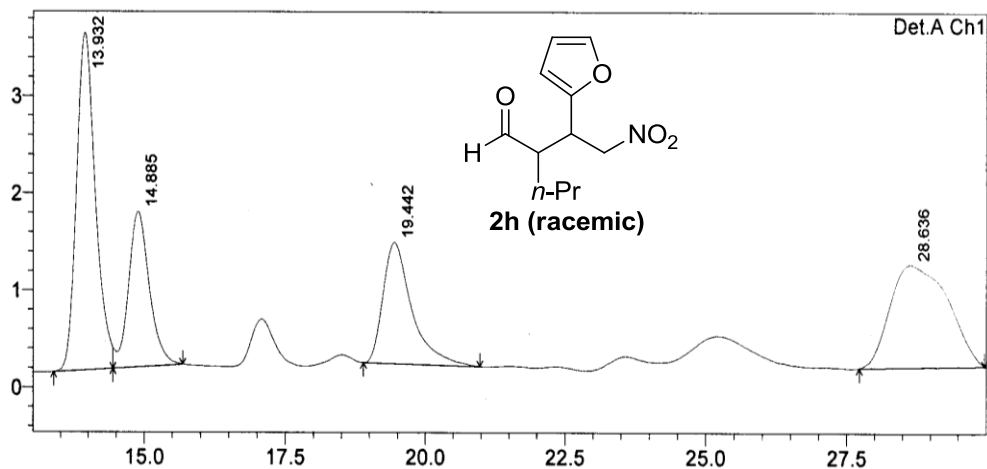

Detector A Ch1 254nm

| Peak# | Ret. Time | Area   | Height | Area %  | Height % |
|-------|-----------|--------|--------|---------|----------|
| 1     | 13.932    | 82195  | 3478   | 33.516  | 47.082   |
| 2     | 14.885    | 41720  | 1603   | 17.012  | 21.693   |
| 3     | 19.442    | 44926  | 1250   | 18.320  | 16.925   |
| 4     | 28.636    | 76396  | 1056   | 31.152  | 14.300   |
| Total |           | 245237 | 7388   | 100.000 | 100.000  |

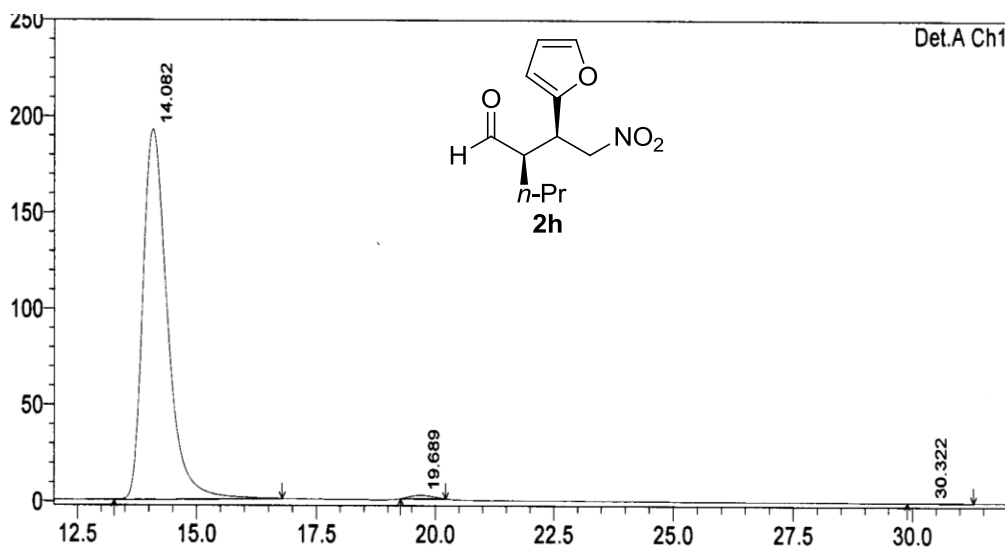

Detector A Ch1 254nm

| Peak# | Ret. Time | Area    | Height | Area %  | Height % |
|-------|-----------|---------|--------|---------|----------|
| 1     | 14.082    | 6869590 | 192299 | 99.054  | 99.021   |
| 2     | 19.689    | 59114   | 1775   | 0.852   | 0.914    |
| 3     | 30.322    | 6505    | 127    | 0.094   | 0.065    |
| Total |           | 6935209 | 194201 | 100.000 | 100.000  |



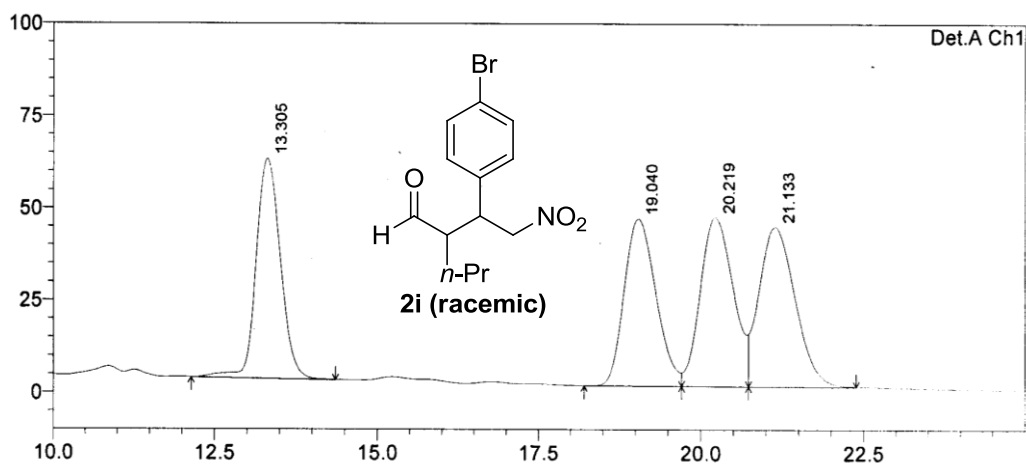

Detector A Ch1 254nm

| Peak# | Ret. Time | Area    | Height | Area %  | Height % |
|-------|-----------|---------|--------|---------|----------|
| 1     | 13.305    | 1545430 | 59580  | 24.246  | 30.679   |
| 2     | 19.040    | 1545332 | 45366  | 24.244  | 23.360   |
| 3     | 20.219    | 1619043 | 45912  | 25.401  | 23.641   |
| 4     | 21.133    | 1664185 | 43346  | 26.109  | 22.320   |
| Total |           | 6373990 | 194204 | 100.000 | 100.000  |

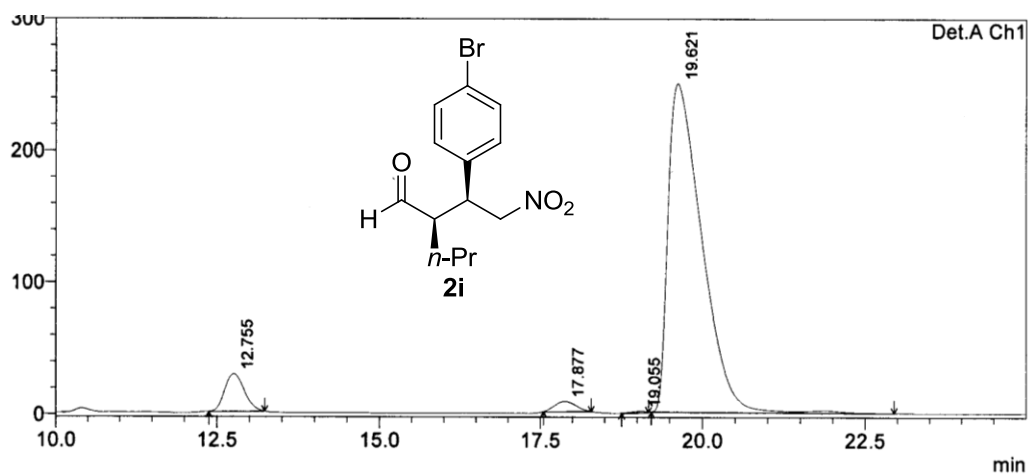

Detector A Ch1 254nm

| Peak# | Ret. Time | Area    | Height | Area %  | Height % |
|-------|-----------|---------|--------|---------|----------|
| 1     | 12.755    | 594958  | 28623  | 6.092   | 10.001   |
| 2     | 17.877    | 179237  | 7774   | 1.835   | 2.716    |
| 3     | 19.055    | 20139   | 1068   | 0.206   | 0.373    |
| 4     | 19.621    | 8972277 | 248741 | 91.867  | 86.910   |
| Total |           | 9766611 | 286205 | 100.000 | 100.000  |

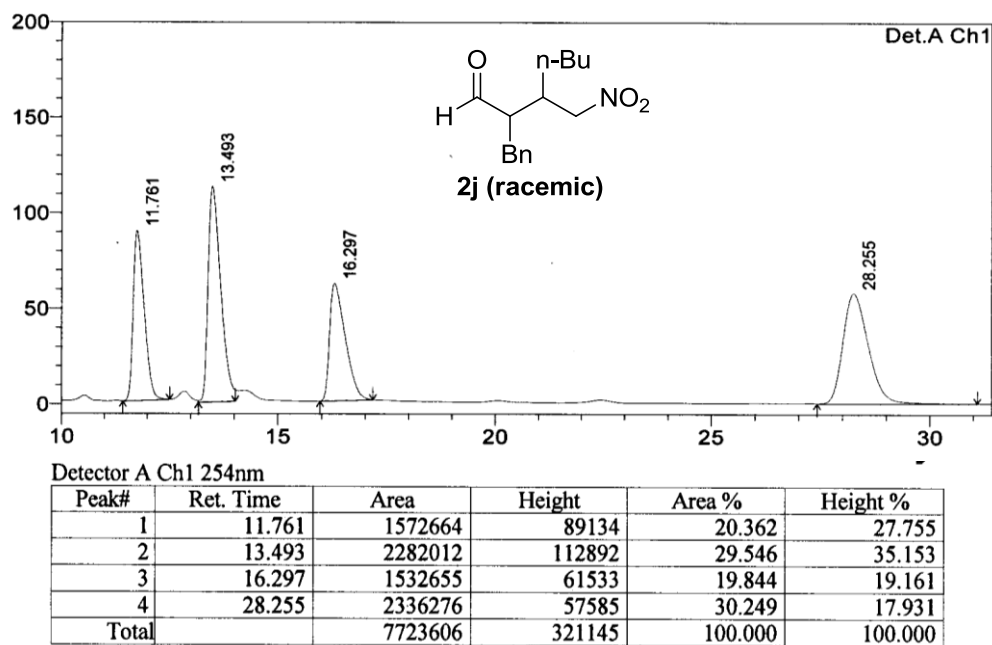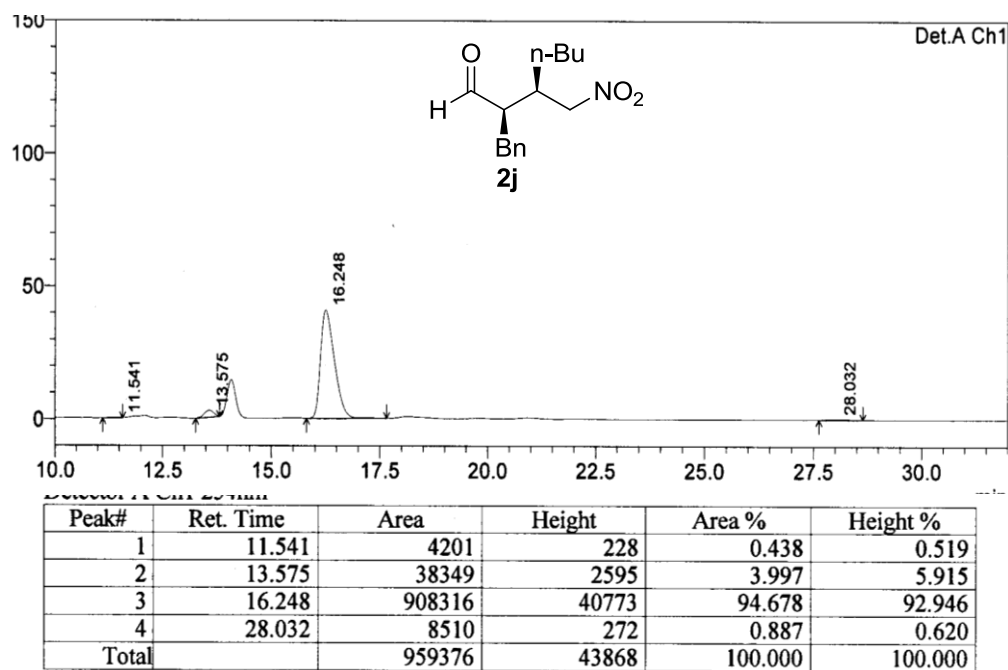

Supplement: c3ob27398a.pdf [file c3ob27398a.pdf]
